# Supplementary material
Source: publisher site journal article supplement (https://www.dovepress.com/article/569624)
Supplement: Supplementary file 1 [file 569624%20Supplementary%20Table%20S1.docx]

**Supplementary Table S1：Detailed stratification of clinical features by severity grade, including fever severity, joint symptom severity, rash severity, and inflammatory marker categories**

| Characteristic | Mild Disease (N=101) | Moderate-Severe Disease (N=210) | *χ2* | P-value |
| --- | --- | --- | --- | --- |
| Age Group Stratification |  | | | |
| Pediatric group (<18 years) | 40 (39.6) | 74 (35.2) | 16.361 | 0.001 |
| Young adult group (18-44 years) | 18 (17.8) | 81 (38.6) |
| Middle-aged group (45-64 years) | 25 (24.8) | 37 (17.6) |
| Elderly group (≥65 years) | 18 (17.8) | 18 (8.6) |
| Fever Severity Stratification |  | | | |
| Low-grade fever (37-38°C) | 38 (37.6) | 74 (35.2) | 0.724 | 0.868 |
| Moderate fever (38-39°C) | 35 (34.7) | 71 (33.8) |
| High fever (39-40°C) | 12 (11.9) | 30 (14.3) |
| Hyperpyrexia (>40°C) | 3 (3.0) | 4 (1.9) |
| Joint symptom severity Stratification |  | | | |
| Mild | 48 (47.5) | 81 (38.6) | 32.940 | 0.001 |
| Moderate | 18 (17.8) | 28 (13.3) |
| Severe | 0 (0.0) | 63 (30.0) |
| **Rash Severity Stratification** |  | | | |
| Mild rash | 33 (10.6) | 23 (7.4) | 95.337 | 0.001 |
| Moderate rash | 7 (2.3) | 27 (8.7) |
| Severe rash | 0 (0) | 137 (44.1) |
| **CRP Elevation Stratification** |  | | | |
| Mildly elevated (3.1-10 mg/L) | 33 (10.6) | 74 (23.8) | 4.066 | 0.131 |
| Moderately elevated (10.1-30 mg/L) | 24 (7.7) | 52 (16.7) |
| Severely elevated (>30 mg/L) | 12 (3.9) | 11 (3.5) |

Data are presented as frequency (percentage). Categorical variables were compared using the Pearson’s chi-square test (or Fisher’s exact test when any expected cell count was <5). A two-sided P-value <0.05 was considered statistically significant.
